# Supplementary material for: Assessment of Price and Clinical Benefit of Cancer Drugs in Canada, 2011-2020
Source: PubMed Central journal article supplement (PMC9890281; doi:10.1001/jamanetworkopen.2022.53438), 2023-01-31
Supplement: jamanetwopen-e2253438-s001.pdf [file jamanetwopen-e2253438-s001.pdf]

## Data Sharing Statement

Jenei. Assessment of Price and Clinical Benefit of Cancer Drugs in Canada, 2011-2020. *JAMA Netw Open*. Published January 31, 2023. doi:10.1001/jamanetworkopen.2022.53438

### Data

**Data available:** No

### Additional Information

**Explanation for why data not available:** Data collected was publicly available data that can be downloaded from the CADTH website. In addition, researchers can contact the lead author ([k.jenei@lse.ac.uk](mailto:k.jenei@lse.ac.uk)) to obtain a copy of the data, if needed.
